# Supplementary material for: Spinal Manipulative Therapy for Acute Neck Pain: A Systematic Review and Meta-Analysis of Randomised Controlled Trials
Source: MDPI journal article supplement (doi:10.3390/jcm10215011), 2021-10-28
Supplement: s1 [file s1]

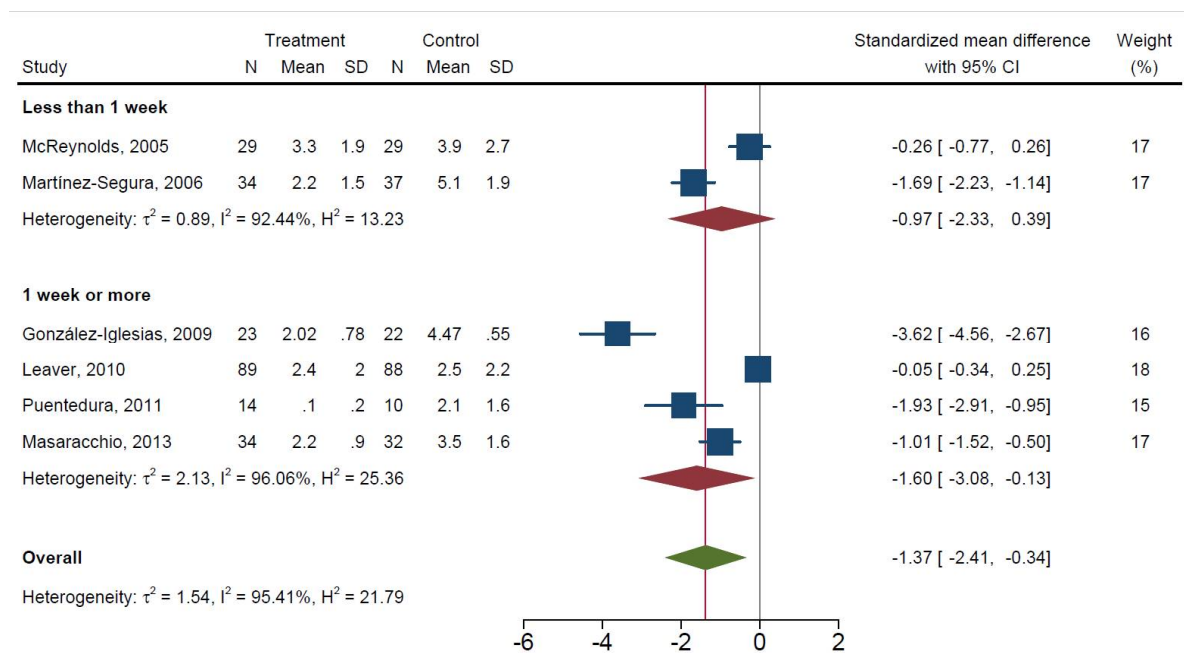

Figure S1. forest end by time.

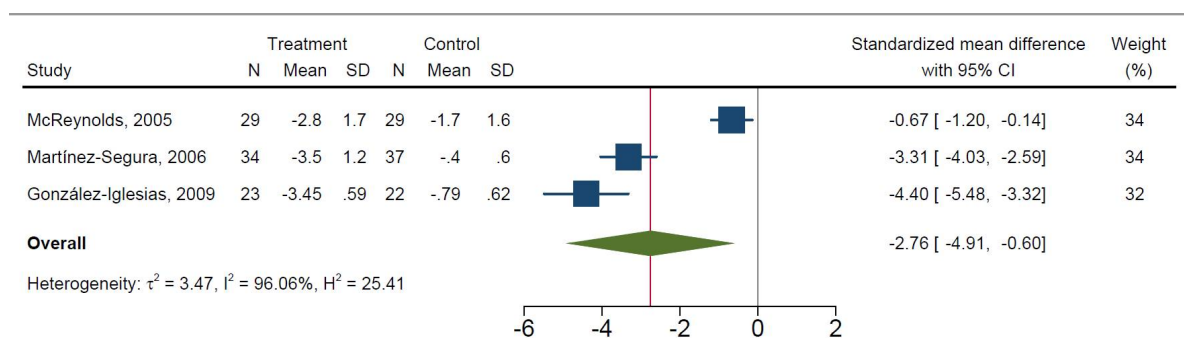

Figure S2. forest change overall.

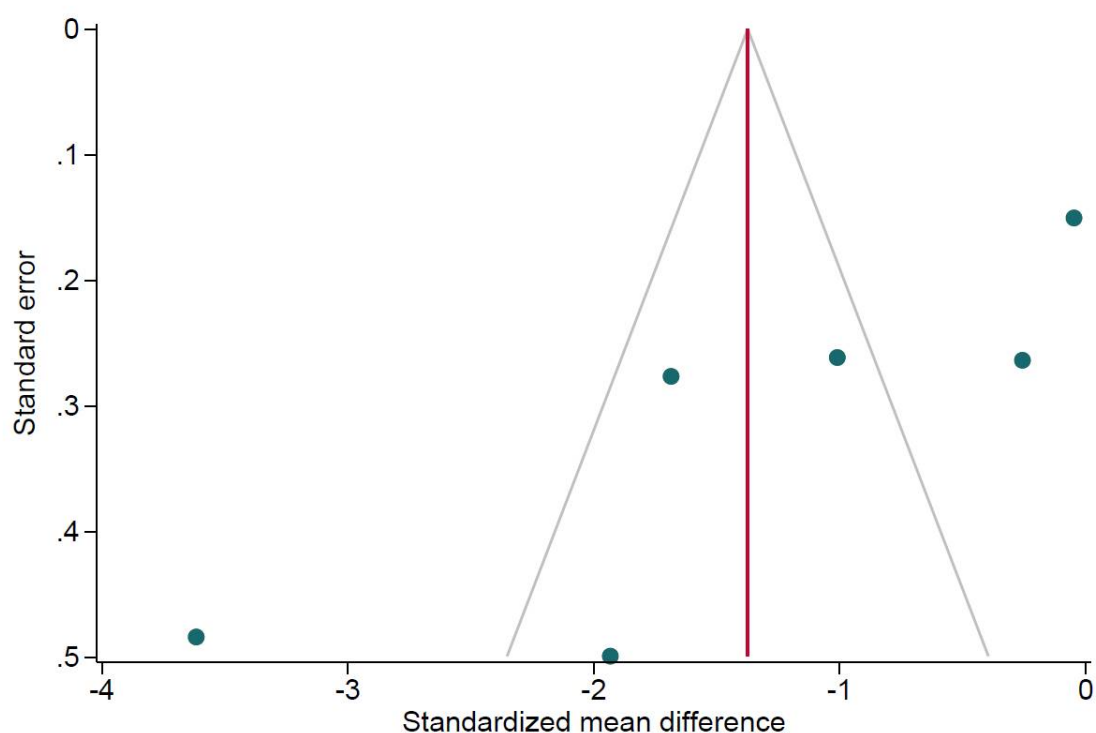

**Figure S3.** funnelplot overall.

**Table S1.** Rating of quality of the body of evidence across studies of short-term effects of manipulation therapy vs. control.

| Item                             | Comment                                                                                                                                                                                                                                              | Rating      |
|----------------------------------|------------------------------------------------------------------------------------------------------------------------------------------------------------------------------------------------------------------------------------------------------|-------------|
| Study design                     | The studies were all RCTs                                                                                                                                                                                                                            | High (RCTs) |
| Study limitations (risk of bias) | There were several threats to internal validity in the studies.                                                                                                                                                                                      | -2          |
|                                  | Lack of allocation concealment in 2 of 6 studies, and lack of blinding of participants and personnel                                                                                                                                                 |             |
|                                  | Dropouts: difference with regard to whether ITT was used                                                                                                                                                                                             |             |
|                                  | Only 3 of 6 studies reported change; possible bias related to selective reporting                                                                                                                                                                    |             |
|                                  | Heterogeneity in interventions and control arms across studies                                                                                                                                                                                       |             |
| Indirectness of evidence         | Heterogeneity in time for first or only outcome assessment: 1 h to 1 day in two studies; 1-3 week in other studies. Other periods not similar either (up to 6 months)                                                                                | 0           |
|                                  | The studies used numeric rating scales (n=4) or visual analog scales (n=2), which may have different properties                                                                                                                                      |             |
|                                  | Limited scope: Short-term effect on pain. Might be other important outcomes.                                                                                                                                                                         |             |
| Inconsistency of results         | Considerable heterogeneity in the effects, as assessed by $I^2$ and a statistical test for heterogeneity. The effect varied by choice of rating scale, but not by other study characteristics, as indicated in exploratory meta-regression analyses. | -1          |
| Imprecision                      | Most studies were small (24-71 patients), except for one with n=182. In total, n=441 participants were evaluated. The small size of the studies, lead to wide confidence intervals.                                                                  | -1          |
| Publication bias likely          | Altogether few studies were identified. It is possible that studies were                                                                                                                                                                             | -1          |

|                                                                                                                                                                                                                                                                  |                                                                                                                    |   |
|------------------------------------------------------------------------------------------------------------------------------------------------------------------------------------------------------------------------------------------------------------------|--------------------------------------------------------------------------------------------------------------------|---|
| unpublished or published in places that could not be identified (funnel plot, test of asymmetry).                                                                                                                                                                |                                                                                                                    |   |
| Dose-response                                                                                                                                                                                                                                                    | N/A                                                                                                                | 0 |
| Plausible confounding                                                                                                                                                                                                                                            | RCTs, therefore N/A                                                                                                | 0 |
| Magnitude of effect                                                                                                                                                                                                                                              | As classified by the standardized response mean, the effect was large (SRM >1.3), although there is a risk of bias | 0 |
| The overall level of the body of evidence was rated as very low [ $\oplus\circ\circ\circ$ ], i.e. we have very little confidence in the effect estimate, and the true effect is likely to be substantially different from the estimate of effect (Balshem 2011). |                                                                                                                    |   |

## Reference

1. Balshem, H.; Helfand, M.; Schünemann, H.J.; et al. GRADE guidelines: 3. Rating the quality of evidence. *J. Clin. Epidemiol.* **2011**, *64*, 401–406.
